# Supplementary material
Source: PubMed Central journal article supplement (PMC3064340)
Supplement: 1010010108_pnas.201010010SI.pdf [file 1010010108_pnas.201010010SI.pdf]

# Supporting Information

Graczyk et al. 10.1073/pnas.1010010108

## SI Materials and Methods

**Maf1-Cka2 Coimmunoprecipitation.** Cka2 was HA-tagged in YPH499 strain as described previously (1). The sequences of primers used are available upon request. Cells expressing HA epitope-tagged Cka2 were grown in rich glucose medium (YPD) to exponential phase and transferred to a nonfermentable glycerol medium (YPGly) and incubated for 3 h at 30 °C. Cells were pelleted and frozen in liquid nitrogen. Pellets corresponding to 50 mL of culture were thawed on ice and resuspended in 0.5 mL of IP buffer (50 mM Hepes-KOH pH 7.5, 250 mM NaCl, 1 mM EDTA, 0.05% Nonidet P-40, 0.5 mM DTT, 10% glycerol, O-Complete protease inhibitor; Roche). Cells were broken with glass beads using Vibramax disruptor (IKA) at maximum speed for 30 min at 4 °C. Cellular debris was removed by centrifugation at 11,000 × *g* for 10 min at 4 °C. Protein concentration was determined with the Bio-Rad protein assay. Fifty microliters of suspension of Dynabeads PanMouse IgG magnetic beads (Invitrogen), washed three times with 0.5 mL PBS containing 0.5% BSA, was incubated for 1 h with mouse monoclonal anti-HA 16B12 antibody at 4 °C. After extensive washing in PBS containing 0.5% BSA and then in IP buffer, the beads were incubated overnight with equal amounts (usually 2 mg) of protein extracts with gentle shaking at 4 °C, then washed five times with IP buffer. Immunoprecipitated proteins were eluted by boiling for 3 min in SDS gel electrophoresis loading buffer and analyzed by 8% SDS/PAGE followed by Western blotting.

**Maf1-Rpc160 Coimmunoprecipitation.** Yeast cells expressing HA epitope-tagged Rpc160 (strain MW4415) were grown in rich glucose medium (YPD) to exponential phase and transferred to a nonfermentable glycerol medium (YPGly). Following 3 h incubation at 30 °C, the culture was split in half; one part was transferred to YPD with 2% (vol/vol) DMSO and the other to YPD with 100 μM TBBT in DMSO. Cultures were grown for 1 h at 30 °C, then pelleted and frozen in liquid nitrogen. Further steps were the same as described above except that protein extract was incubated with beads for 4 h and the composition of IP buffer was: 50 mM Hepes-KOH pH 7.5, 100 mM NaCl, 1 mM EDTA, 0.05% Nonidet P-40, 0.5 mM DTT, 5% glycerol, O-Complete protease inhibitor (Roche).

**Chromatin Immunoprecipitation (ChIP).** Overnight yeast cultures were used to inoculate fresh YPD medium to OD<sub>600</sub> of 0.2. The cultures were grown to OD<sub>600</sub> of 0.6–0.8 and fixed with formaldehyde at a final concentration of 1% for 20 min at room temperature. The fixing was stopped by the addition of glycine to 340 mM and incubation for 5 min. The fixed cells (usually 50 mL) were harvested by centrifugation, washed twice with cold PBS, frozen and stored at –80 °C for further use.

The cell pellets were thawed, resuspended in 700 μL of lysis buffer (50 mM Hepes-KOH pH 7.5, 140 mM NaCl, 1 mM EDTA, 1% Triton X-100, 0.1% Na-deoxycholate, 1 mM PMSF, O-Complete protease inhibitor; Roche) and transferred to 2-mL Eppendorf tubes. Glass beads (~0.2 mL, 0.4–0.6 mm; Sigma) were then added to each tube and the cells were lysed at 4 °C for 45 min using a Vibramax disruptor (IKA) at maximum speed. Each tube was pierced at the bottom and the cell lysate was collected by centrifugation in a fresh tube. The lysate was then sonicated eight times for 30 s with 30-s intervals in a Bioruptor (Diagenode) set to maximum power. The sonication resulted in chromatin fragments of 0.2–1 kb with a mean size of 450 bp as determined by gel electrophoresis. After 20 min of centrifugation

in 1.5-mL Eppendorf tubes at 15,000 rpm, the supernatant (whole cell extract, WCE) was transferred to another tube on ice. The preparation of magnetic beads, immunoprecipitation (anti-myc 9E10), elution from beads, reversal of crosslinking, and DNA purification were done exactly as described (2).

## Real-Time PCR Quantification of Immunoprecipitated DNA Fragments.

For ChIP experiments, the input and immunoprecipitated samples were assayed by quantitative PCR to assess the extent of protein occupancy at different genomic regions. PCR reactions contained 2 μL of DNA template, 300 or 200 nM primer pairs and 5 μL of 2× SYBR Green reaction mix (Sigma-Aldrich). Quantitative PCR was performed on an Applied Biosystem 7300 unit or Roche LightCycler 480 using a 3-min soak at 95 °C, followed by 45 cycles of 15 s at 95 °C, 30 s at 50 °C, and 30 s at 72 °C (with a plate read after each cycle). A melting curve analysis was performed for each sample after PCR amplification to ensure that a single product of expected melting curve characteristics was obtained. Occupancy values (in arbitrary units) were calculated by determining the apparent immunoprecipitation efficiency (the amount of PCR product in the immunoprecipitated sample divided by the amount of PCR product in the input sample) and dividing it by the apparent cross-linking efficiency of a control DNA segment (35S rDNA or TEL15 gene). The sequence of primers used are available upon request.

**Northern Blot Analysis.** Cells (50 mL of liquid culture) were harvested by centrifugation and resuspended in 50 mM sodium acetate, pH 5.3, 10 mM EDTA. Total RNA was isolated by heating and freezing the cells in the presence of SDS and phenol as described previously (3). RNA (5 μg per sample) was resolved by electrophoresis in 8 M urea, 10% PAGE, transferred to Hybond-N<sup>+</sup> membrane (Amersham) with 0.5 × TBE by electroblotting and crosslinked by UV radiation (1,200 mJ/cm<sup>2</sup>). The membrane was prehybridized in phosphate buffer (7% SDS; 0.5 M sodium phosphate pH 7.2; 1 mM EDTA pH 7.0; 1% BSA) and hybridized at 37 °C in the same solution with oligonucleotide probes labeled with [ $\gamma$ -<sup>32</sup>P]-ATP and T4 polynucleotide kinase (New England Biolabs). The probes were: 5'-TATTCCCACAGTTAACTGCGG-3' for tRNA<sup>L<sup>eu</sup></sup>(CAA) and 5'-GGATTGCGGACCAAGCTAA-3' for U3 snoRNA. After hybridization, the blots were washed 2 × 10 min with 1× SSC, 1% SDS and 3 × 10 min with 0.5× SSC, 0.1% SDS at 37 °C, exposed to a phosphorimager screen (Fujifilm). RNA was quantified using a FLA-7000 phosphorimager (Fujifilm). Band intensities were quantified using MultiGauge v3.0 software (Fujifilm).

**Purification of Native CK2 Holoenzyme.** Purification of native CK2 holoenzyme was carried out essentially as described previously (4) until TEV protease cleavage. Briefly, yeast cells with TAP-tagged Cka1 (SC1820) were grown in 16l of YPD medium at 30 °C until OD<sub>600</sub> = ~3. Cells were harvested and resuspended in 500 mL of ice-cold water, harvested again, resuspended in 80 mL of lysis buffer (1 mM DTT, 40 mM Hepes pH 8, 250 mM NaCl, 2 mM PMSF, O-Complete protease inhibitor; Roche) and frozen in liquid nitrogen. Yeast were broken in a laboratory blender with dry ice and the obtained homogenate was clarified by centrifugation in a JA 20 Beckman rotor for 20,000 rpm for 20 min at 4 °C and afterward in a refrigerated 35Ti rotor at 32,000 rpm for 90 min at 4 °C. Obtained extract was then dialyzed against buffer D (1 mM DTT, 40 mM Hepes pH 8, 150 mM NaCl, 1 mM PMSF, 20% glycerol), supplemented with reduced

Triton X-100 (final concentration 0.1%) and incubated with 200  $\mu$ L of IgG Sepharose (Pharmacia) for 2 h at 4 °C under rotation. The resin was washed two times with IPP150 buffer (10 mM Tris-HCl pH 8.0, 150 mM NaCl, 0.1% reduced Triton X-100) and two times with TEV cleavage buffer (10 mM Tris-HCl pH 8.0, 150 mM NaCl, 0.5 mM EDTA, 1 mM DTT). TEV protease cleavage was carried out in 200  $\mu$ L of TEV cleavage buffer with 100 units of TEV protease for 2 h at room temperature.

The eluate was subjected to ion-exchange chromatography on ResourceQ column (GE Healthcare) using AKTA purifier FPLC machine under NaCl gradient (0.15–1 M). CK2 holoenzyme was eluted from the column at ~450 mM NaCl. The purity and composition of the eluted protein was analyzed by SDS/PAGE and Coomassie blue staining.

**Identification of Maf1 Phosphorylation by Mass Spectrometry.** Recombinant, in vitro phosphorylated Maf1, was digested by addition of trypsin (sequencing grade modified trypsin; Promega V5111) directly to the reaction mixture and incubation overnight at 37 °C. Immobilized Maf1-myc was digested on the beads. Magnetic beads were washed with 25 mM ammonium bicarbonate and digested by trypsin as described above.

Isolation of phosphopeptides was performed as described by Thingholm et al. (5). Briefly, peptides obtained after trypsin digestion were mixed with loading buffer (80% acetonitrile, 5% TFA, 1 M phthalic acid) and incubated with titanium dioxide slurry (GL Sciences), in proportion of 0.6 mg of the titanium dioxide per 100  $\mu$ g of peptides for 10 min and centrifuged. Titanium beads were washed with Washing Buffer I (80% acetonitrile, 1% TFA) and with Washing Buffer II (20% acetonitrile, 0.05% TFA). Phosphopeptides were eluted with 30  $\mu$ L water alkalized by ammonia to pH 10.5 and immediately after elution acidified with a mixture of 2  $\mu$ L 10% TFA and 5  $\mu$ L 100% FA.

Peptide mixtures were separated by liquid chromatography before molecular mass measurements on Orbitrap Velos mass spectrometer (Thermo Electron).

Peptide mixture was applied to RP-18 precolumn (nano-ACQUITY Symmetry C18; Waters no. 186003514) using water containing 0.1% TFA as mobile phase and then transferred to nano-HPLC RP-18 column (nanoACQUITY BEH C18; Waters no. 186003545) using an acetonitrile gradient (0–60% AcN in 120 min) in the presence of 0.05% formic acid with the flow rate of 150 nL/min. Column outlet was directly coupled to the ion source of the spectrometer working in the regime of data de-

pendent MS to MS/MS switch. A blank run ensuring lack of cross contamination from previous samples preceded each analysis.

Acquired raw data were processed by Mascot distiller followed by database search with the Mascot program (Matrix Science, 8-processor on-site license) against *Saccharomyces* Genome Database (<http://www.yeastgenome.org/>). Search parameters for precursor and product ions mass tolerance were 20 ppm and 0.4 Da, respectively, without accepting missed trypsin cleavage sites, and the following allowed variable modifications: cysteine and lysine carbamidomethylation, methionine oxidation, serine, threonine, and tyrosine phosphorylation. Peptides with Mascot score exceeding the threshold value corresponding to <5% false positive rate, calculated by Mascot procedure, were considered to be positively identified. Data were next submitted to an additional Mascot database search focusing of Maf1 sequence in an error tolerant option with enzyme specificity changed to semitrypsin and one missed trypsin cleavage site allowed. Then, all peptides identified in the Mascot search runs as phosphorylated were subjected to the confirmation procedure on the basis of visual inspection of the fragmentation spectra corresponding to the modified (and unmodified, when detected) peptide and identification of a significant fraction of expected product ions.

**Purification of Recombinant Maf1 Protein.** To construct expression plasmid coding for His-tagged Maf1, a PCR product containing the *MAF1* sequence was cloned into pET15-b vector (Novagene) using BamHI sites. The 6 $\times$  His tag was thus placed at the N terminus of the expected recombinant protein in the plasmid called pET-MAF. The sequences of primers used are available upon request. The His-tagged Maf1 protein was purified using the QIAexpress protocol (Qiagen). *Escherichia coli* (BL21) was transformed with the pET-MAF construct and grown to OD<sub>600</sub> of about 0.8. The synthesis of the recombinant protein was induced with 1 mM IPTG. After 4 h of incubation, cells were collected and sonicated. After centrifugation the lysate was loaded onto an equilibrated Ni-NTA agarose column (Qiagen). The resin was washed with washing buffer and the protein was eluted with elution buffer containing 100 mM imidazole. The obtained fractions were analyzed by SDS/PAGE.

**Construction of Maf1 Mutants.** Amino acid substitutions in pRS315-*MAF1* were made using QuikChange site-directed mutagenesis kit (Stratagene). The sequences of primers used are available upon request.

- Longtine MS, et al. (1998) Additional modules for versatile and economical PCR-based gene deletion and modification in *Saccharomyces cerevisiae*. *Yeast* 14:953–961.
- Ren B, et al. (2000) Genome-wide location and function of DNA binding proteins. *Science* 290:2306–2309.
- Towpik J, Graczyk D, Gajda A, Lefebvre O, Boguta M (2008) Derepression of RNA polymerase III transcription by phosphorylation and nuclear export of its negative regulator, Maf1. *J Biol Chem* 283:17168–17174.
- Rigaut G, et al. (1999) A generic protein purification method for protein complex characterization and proteome exploration. *Nat Biotechnol* 17:1030–1032.
- Thingholm TE, Jørgensen TJ, Jensen ON, Larsen MR (2006) Highly selective enrichment of phosphorylated peptides using titanium dioxide. *Nat Protoc* 1:1929–1935.
- Sikorski RS, Hieter P (1989) A system of shuttle vectors and yeast host strains designed for efficient manipulation of DNA in *Saccharomyces cerevisiae*. *Genetics* 122:19–27.
- Hanna DE, Rethinaswamy A, Glover CV (1995) Casein kinase II is required for cell cycle progression during G1 and G2/M in *Saccharomyces cerevisiae*. *J Biol Chem* 270:25905–25914.
- Oficjalska-Pham D, et al. (2006) General repression of RNA polymerase III transcription is triggered by protein phosphatase type 2A-mediated dephosphorylation of Maf1. *Mol Cell* 22:623–632.
- Soutourina J, et al. (2006) Rsc4 connects the chromatin remodeler RSC to RNA polymerases. *Mol Cell Biol* 26:4920–4933.
- Bansal PK, Mishra A, High AA, Abdulle R, Kitagawa K (2009) Sgt1 dimerization is negatively regulated by protein kinase CK2-mediated phosphorylation at Ser361. *J Biol Chem* 284:18692–18698.
